# Supplementary material
Source: publisher figshare collection journal article supplement (https://tandf.figshare.com/ndownloader/files/22661357)
Supplement: Supplementary file 1 [file 22661357]

**Supplementary data**

**
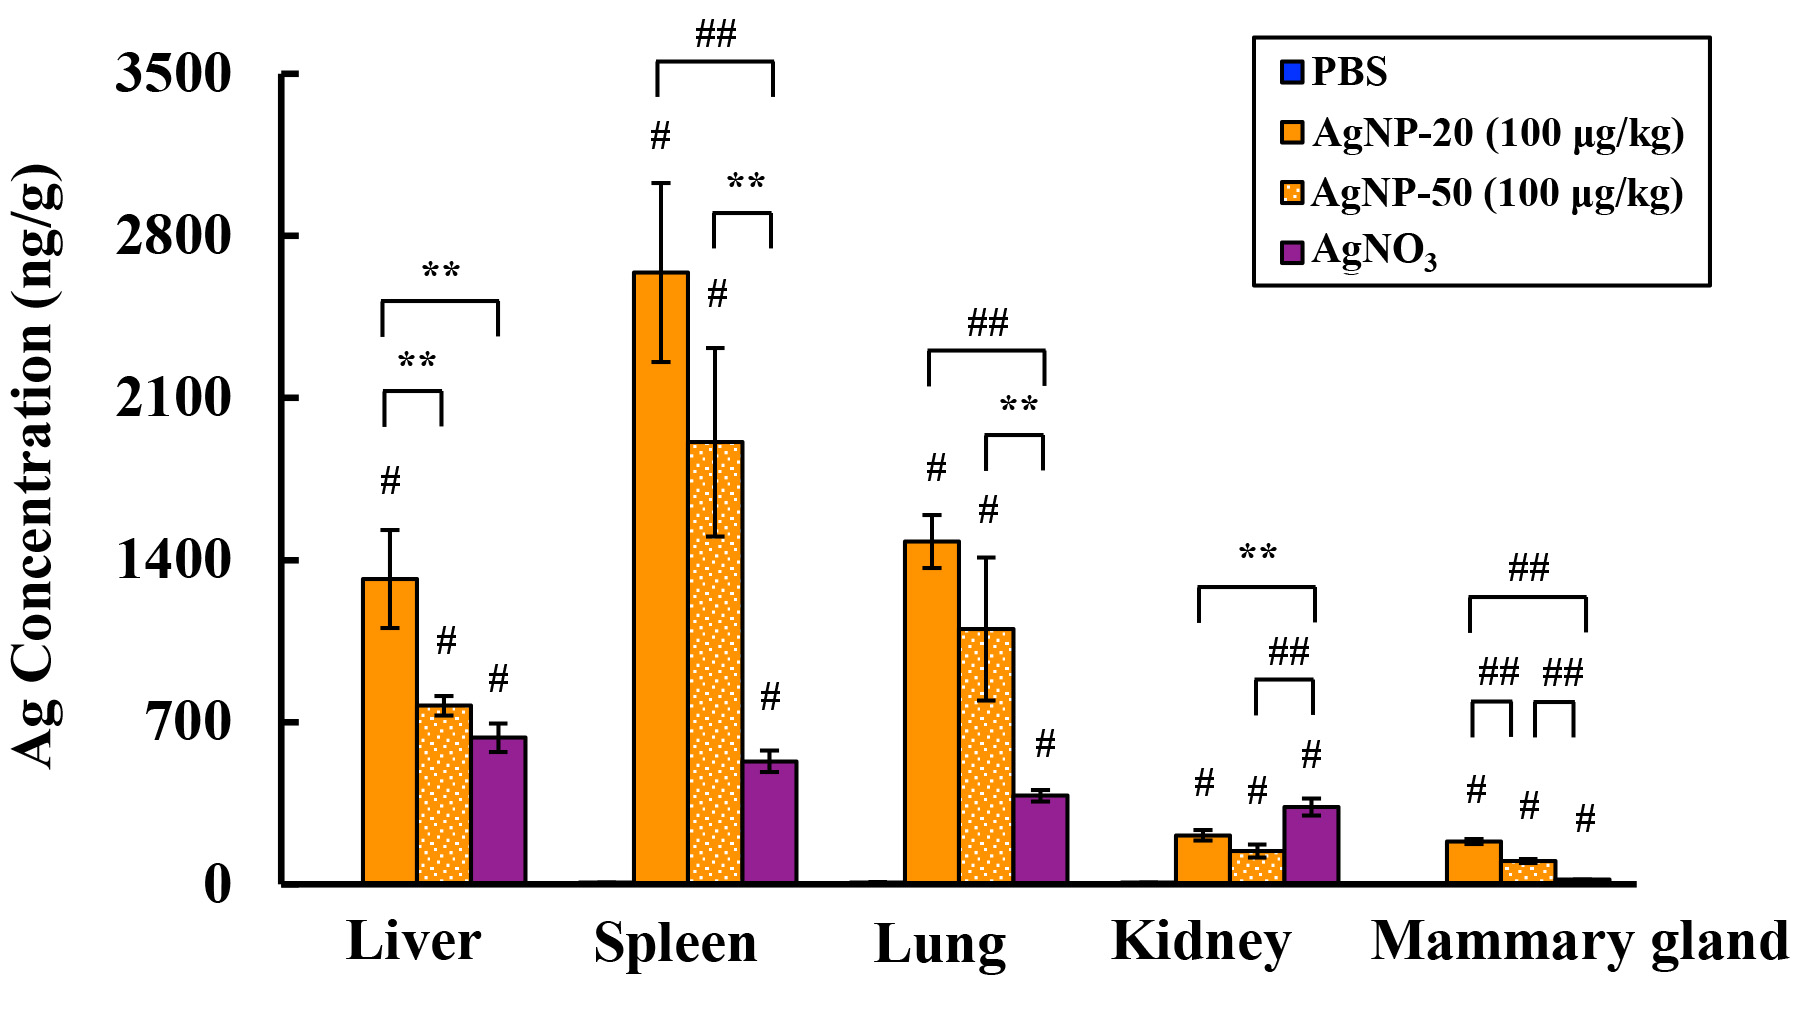
**

**Figure S1.** Ag concentration in major organs from mice exposed to AgNP-20 or AgNP-50 at 100 μg/kg body weight, or AgNO3 at 157 μg/kg body weight (n = 8-10). Liver, spleen, lung, kidney, and the fourth and fifth pairs of mammary glands were collected and digested for the detection of total Ag content by ICP-MS. The symbol # represented *P* < 0.01 compared to the PBS control. Double asterisks (**) and double pound signs (##) denoted *P* < 0.05 and *P* < 0.01 for pairwise comparisons as shown, respectively.
